# Supplementary material for: Copper(II) complexes of 6-hydroxymethyl-substituted tris(2-pyridylmethyl)amine ligands †
Source: Royal Society of Chemistry journal article supplement (doi:10.1039/b000092m), 2000-01-01
Supplement: b000092m.doc [file b000092m.doc]

Revised manuscript (Paper Ref. B000092) for publication in *J. Chem. Soc., Dalton Trans.*

***Copper(ii) Complexes of 6-Hydroxymethyl-substituted Tris(2-pyridylmethyl)amine Ligands***

Zhicong He, P. Jinny Chaimungkalanont, Donald C. Craig and
Stephen B. Colbran*

**ELECTRONIC SUPPLEMENTARY INFORMATION**

**FIGURE CAPTIONS**

**ESI Figure 1.** View of the [Cu(Br0.43Cl0.57)2(Br0.97Cl0.03)2]2– ion from the crystal structure of **5** showing 10 % thermal ellipsoids at 294 K.

**ESI Figure 2.** VIS/NIR spectra of **1** (a), **2** (b), **5** (c) and **6** (d) in methanol solution.

**ESI Figure 3.** VIS/NIR spectra of **7** in methanol solution (——) and in the solid-state (- - - -).
